# Supplementary material for: Paediatric COVID-19 Outcomes: Haematology Parameters, Mortality Rates, and Hospitalization Duration
Source: MDPI journal article supplement (doi:10.3390/children10101615), 2023-09-28
Supplement: s1 [file s1]

**Table S1.** Descriptive analyses for hematology and coagulation parameters.

| Parameter                                 | Groups         |         |          |             |                |         |          |             |
|-------------------------------------------|----------------|---------|----------|-------------|----------------|---------|----------|-------------|
|                                           | Negative Covid |         |          |             | Positive Covid |         |          |             |
|                                           | Neonates       | Infants | Children | Adolescents | Neonates       | Infants | Children | Adolescents |
| <b>Platelet count (10<sup>3</sup>/mL)</b> |                |         |          |             |                |         |          |             |
| Number of values                          | 343            | 754     | 4547     | 2102        | 17             | 79      | 722      | 574         |
| 25% Percentile                            | 216.0          | 284.5   | 255.0    | 242.0       | 249.5          | 284.0   | 246.8    | 244.5       |
| Median                                    | 300.0          | 377.0   | 318.0    | 296.0       | 360.0          | 372.0   | 311.5    | 300.0       |
| 75% Percentile                            | 411.0          | 476.3   | 392.0    | 356.0       | 564.0          | 487.0   | 377.0    | 370.0       |
| Mean                                      | 320.1          | 398.0   | 330.1    | 306.4       | 402.5          | 392.3   | 315.1    | 311.2       |
| Std. Deviation                            | 167.6          | 184.9   | 131.4    | 115.2       | 189.9          | 161.9   | 116.3    | 109.0       |
| Std. Error of Mean                        | 9.048          | 6.734   | 1.949    | 2.512       | 46.07          | 18.21   | 4.330    | 4.548       |
| <b>PTT (seconds)</b>                      |                |         |          |             |                |         |          |             |
| Number of values                          | 161            | 308     | 2079     | 983         | 10             | 27      | 248      | 182         |
| 25% Percentile                            | 30.55          | 26.63   | 26.20    | 26.70       | 30.25          | 27.30   | 26.20    | 27.60       |
| Median                                    | 35.80          | 29.40   | 28.50    | 29.00       | 38.50          | 30.10   | 28.90    | 29.40       |
| 75% Percentile                            | 43.15          | 33.85   | 31.00    | 31.50       | 44.00          | 35.00   | 32.40    | 32.00       |
| Mean                                      | 40.51          | 32.68   | 31.19    | 30.11       | 39.50          | 31.35   | 29.95    | 30.15       |
| Std. Deviation                            | 19.25          | 18.43   | 32.75    | 10.07       | 14.76          | 5.842   | 5.741    | 4.384       |
| Std. Error of Mean                        | 1.517          | 1.050   | 0.7182   | 0.3211      | 4.669          | 1.124   | 0.3645   | 0.3250      |
| <b>D-dimer (mg/L)</b>                     |                |         |          |             |                |         |          |             |
| Number of values                          | 16             | 32      | 231      | 134         | 4              | 8       | 39       | 25          |
| 25% Percentile                            | 0.9000         | 0.8800  | 0.5700   | 0.3850      | 1.275          | 0.5000  | 0.5700   | 0.4500      |
| Median                                    | 4.400          | 2.160   | 1.410    | 1.120       | 1.755          | 0.7050  | 0.9000   | 0.9700      |
| 75% Percentile                            | 17.47          | 3.783   | 3.980    | 3.268       | 2.153          | 1.820   | 1.690    | 3.570       |
| Mean                                      | 9.448          | 6.160   | 3.548    | 4.041       | 1.728          | 1.954   | 2.404    | 2.738       |
| Std. Deviation                            | 11.75          | 10.50   | 5.890    | 7.345       | 0.4594         | 3.285   | 3.945    | 3.830       |
| Std. Error of Mean                        | 2.938          | 1.855   | 0.3876   | 0.6345      | 0.2297         | 1.162   | 0.6316   | 0.7659      |
| <b>WBC (10<sup>9</sup>/L)</b>             |                |         |          |             |                |         |          |             |
| Number of values                          | 343            | 685     | 4547     | 2103        | 17             | 80      | 724      | 574         |

|                                |          |          |          |          |         |          |          |          |
|--------------------------------|----------|----------|----------|----------|---------|----------|----------|----------|
| 25% Percentile                 | 8.380    | 8.000    | 6.100    | 5.700    | 6.645   | 8.443    | 5.400    | 5.208    |
| Median                         | 10.40    | 10.70    | 8.100    | 7.400    | 8.900   | 11.60    | 7.300    | 6.845    |
| 75% Percentile                 | 13.40    | 14.05    | 10.80    | 9.790    | 11.25   | 14.80    | 9.913    | 9.000    |
| Mean                           | 11.46    | 11.60    | 9.181    | 8.885    | 8.849   | 11.95    | 8.287    | 7.507    |
| Std. Deviation                 | 5.405    | 5.414    | 8.377    | 15.12    | 2.988   | 5.439    | 4.531    | 3.367    |
| Std. Error of Mean             | 0.2586   | 0.2069   | 0.1173   | 0.3297   | 0.6681  | 0.6081   | 0.1536   | 0.1405   |
| <b>RBC (10<sup>12</sup>/L)</b> |          |          |          |          |         |          |          |          |
| Number of values               | 343      | 685      | 4547     | 2103     | 17      | 80       | 724      | 574      |
| 25% Percentile                 | 3.448    | 3.990    | 4.300    | 4.330    | 3.310   | 4.085    | 4.360    | 4.400    |
| Median                         | 4.265    | 4.440    | 4.630    | 4.750    | 4.025   | 4.515    | 4.750    | 4.760    |
| 75% Percentile                 | 4.933    | 4.820    | 4.950    | 5.150    | 4.865   | 4.943    | 5.100    | 5.200    |
| Mean                           | 4.272    | 4.384    | 4.582    | 4.697    | 4.079   | 4.466    | 4.676    | 4.763    |
| Std. Deviation                 | 1.030    | 0.7230   | 0.6514   | 0.7177   | 0.8766  | 0.6756   | 0.7424   | 0.7052   |
| Std. Error of Mean             | 0.04919  | 0.02762  | 0.009120 | 0.01565  | 0.1960  | 0.07553  | 0.02517  | 0.02943  |
| <b>Hct (%)</b>                 |          |          |          |          |         |          |          |          |
| Number of values               | 270      | 427      | 2739     | 1101     | 7       | 44       | 450      | 280      |
| 25% Percentile                 | 0.3210   | 0.3220   | 0.3500   | 0.3555   | 0.3010  | 0.3433   | 0.3548   | 0.3763   |
| Median                         | 0.4060   | 0.3600   | 0.3800   | 0.3970   | 0.3270  | 0.3610   | 0.3840   | 0.4140   |
| 75% Percentile                 | 0.4970   | 0.3890   | 0.4060   | 0.4370   | 0.3870  | 0.3928   | 0.4090   | 0.4508   |
| Mean                           | 0.4140   | 0.3559   | 0.3747   | 0.3923   | 0.3366  | 0.3626   | 0.3779   | 0.4096   |
| Std. Deviation                 | 0.1122   | 0.05323  | 0.05459  | 0.06371  | 0.04851 | 0.03763  | 0.05525  | 0.06377  |
| Std. Error of Mean             | 0.006826 | 0.002576 | 0.001043 | 0.001920 | 0.01834 | 0.005672 | 0.002604 | 0.003811 |
| <b>MCV (fL)</b>                |          |          |          |          |         |          |          |          |
| Number of values               | 343      | 685      | 4547     | 2103     | 17      | 80       | 724      | 574      |
| 25% Percentile                 | 81.08    | 80.15    | 80.50    | 80.90    | 91.45   | 75.13    | 78.60    | 80.28    |
| Median                         | 86.90    | 86.30    | 86.00    | 86.10    | 98.00   | 80.25    | 82.70    | 84.95    |
| 75% Percentile                 | 91.90    | 91.20    | 90.70    | 90.40    | 104.0   | 84.20    | 86.60    | 89.20    |
| Mean                           | 85.76    | 85.51    | 84.92    | 84.78    | 97.34   | 80.13    | 82.07    | 83.87    |
| Std. Deviation                 | 10.23    | 8.741    | 8.790    | 8.721    | 8.548   | 8.022    | 7.204    | 8.025    |
| Std. Error of Mean             | 0.4886   | 0.3340   | 0.1230   | 0.1902   | 1.911   | 0.8969   | 0.2442   | 0.3350   |

|                    |        |        |         |         |        |        |         |         |
|--------------------|--------|--------|---------|---------|--------|--------|---------|---------|
| <b>MCH (g/dL)</b>  |        |        |         |         |        |        |         |         |
| Number of values   | 438    | 685    | 5104    | 2103    | 20     | 80     | 870     | 574     |
| 25% Percentile     | 26.68  | 26.40  | 26.30   | 26.40   | 30.80  | 25.70  | 26.00   | 26.10   |
| Median             | 28.50  | 28.60  | 28.30   | 28.30   | 32.70  | 26.80  | 27.50   | 27.90   |
| 75% Percentile     | 30.10  | 30.10  | 29.80   | 29.80   | 34.58  | 27.98  | 28.70   | 29.33   |
| Mean               | 28.22  | 28.19  | 27.85   | 27.82   | 32.68  | 26.63  | 27.16   | 27.48   |
| Std. Deviation     | 3.622  | 3.230  | 2.986   | 3.081   | 2.903  | 2.431  | 2.537   | 2.814   |
| Std. Error of Mean | 0.1731 | 0.1234 | 0.04180 | 0.06719 | 0.6491 | 0.2718 | 0.08602 | 0.1174  |
| <b>MCHC (g/L)</b>  |        |        |         |         |        |        |         |         |
| Number of values   | 438    | 685    | 5104    | 2103    | 20     | 80     | 870     | 574     |
| 25% Percentile     | 309.0  | 307.5  | 308.0   | 306.0   | 33.30  | 103.7  | 36.08   | 35.80   |
| Median             | 325.0  | 326.0  | 324.0   | 323.0   | 329.5  | 328.0  | 325.0   | 323.0   |
| 75% Percentile     | 334.0  | 335.0  | 332.0   | 333.0   | 344.5  | 338.0  | 335.0   | 331.0   |
| Mean               | 265.4  | 259.0  | 261.5   | 260.5   | 232.0  | 258.2  | 254.5   | 251.6   |
| Std. Deviation     | 122.0  | 128.1  | 123.5   | 124.5   | 150.1  | 131.2  | 129.5   | 128.7   |
| Std. Error of Mean | 5.831  | 4.896  | 1.729   | 2.714   | 33.57  | 14.67  | 4.390   | 5.370   |
| <b>RDW (%)</b>     |        |        |         |         |        |        |         |         |
| Number of values   | 438    | 685    | 5104    | 2103    | 20     | 80     | 870     | 574     |
| 25% Percentile     | 12.70  | 12.60  | 12.50   | 12.50   | 14.03  | 12.73  | 12.60   | 12.40   |
| Median             | 13.70  | 13.70  | 13.30   | 13.30   | 14.35  | 13.80  | 13.40   | 13.30   |
| 75% Percentile     | 15.50  | 15.40  | 14.70   | 14.70   | 15.90  | 15.23  | 14.20   | 14.50   |
| Mean               | 14.47  | 14.35  | 13.93   | 13.89   | 14.78  | 14.32  | 13.72   | 13.82   |
| Std. Deviation     | 2.883  | 2.677  | 2.437   | 2.470   | 1.464  | 2.623  | 1.858   | 2.190   |
| Std. Error of Mean | 0.1377 | 0.1023 | 0.03411 | 0.05387 | 0.3273 | 0.2933 | 0.06298 | 0.09142 |

PTT; activated partial thromboplastin time, WBC; white blood cell count, RBC; red blood cell count, Hct; hematocrit, MCV; mean corpuscular volume, MCH; mean corpuscular hemoglobin, MCHC; mean corpuscular hemoglobin concentration, and RDW; red distribution width.

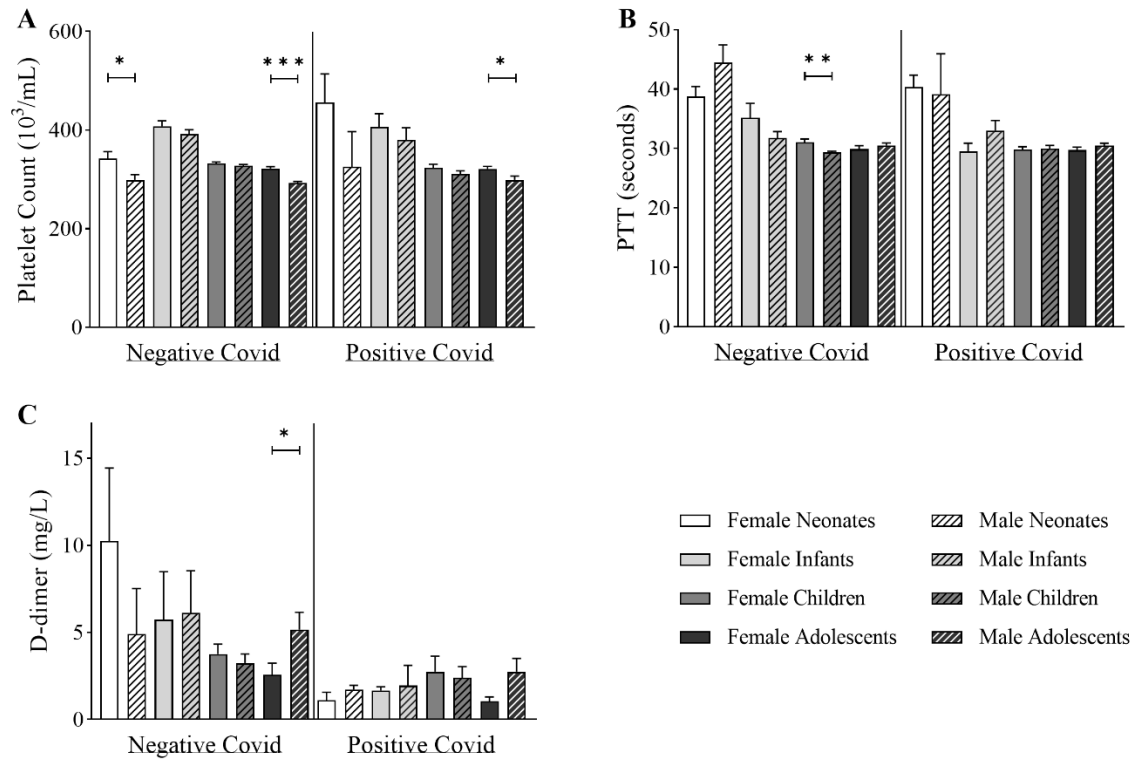

**Figure S1.** Differences in coagulation parameters study groups based on patient sex. (A) platelets count, (B) PTT (partial thromboplastin time), and (C) D-dimer (fibrinogen degradation products). \* denotes a significant difference between females and males (\* $P < 0.05$ , \*\* $P < 0.01$ , \*\*\* $P < 0.001$ ).

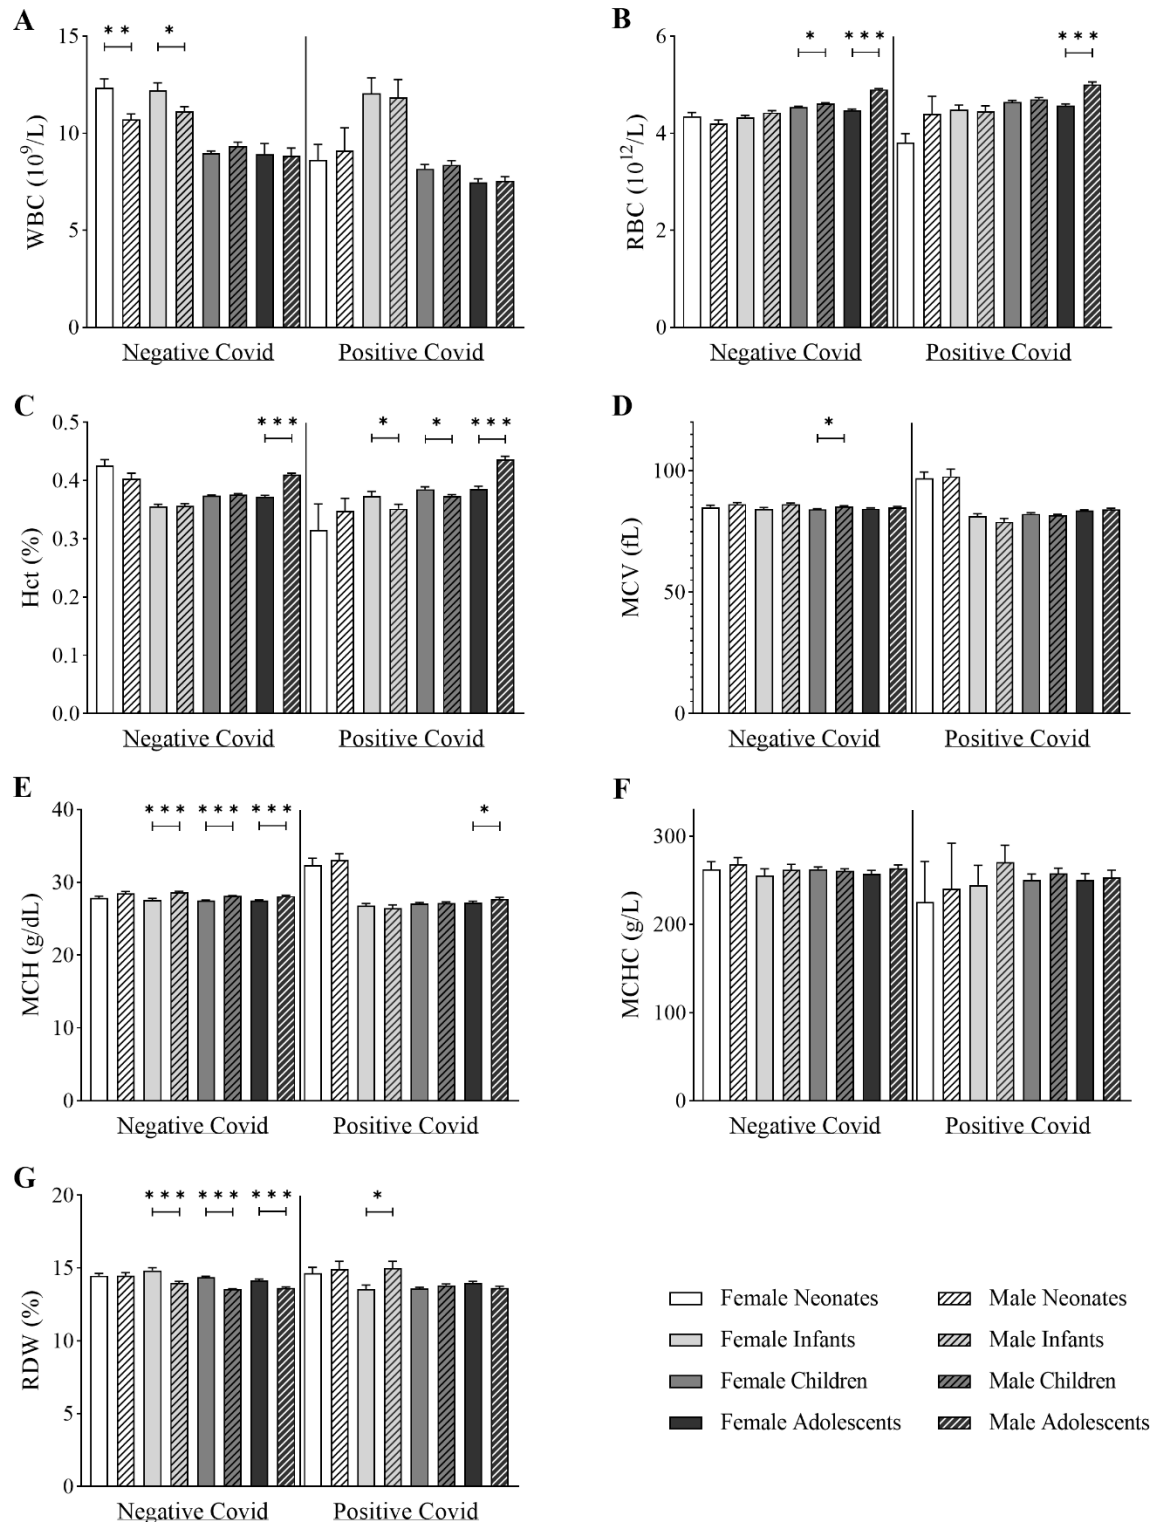

**Figure S2.** Differences in WBC and RBC based on patient sex. (A) WBC count, (B) RBC (red blood cell) Count, (C) Hct (hematocrit), (D) MCV (mean corpuscular volume), (E) MCH (mean corpuscular hemoglobin), (F) MCHC (mean corpuscular hemoglobin concentration), and (G) RDW (red cell distribution width). \* denotes a significant difference between females and males (\*P < 0.05, \*\*P < 0.01, \*\*\*P < 0.001).
